# Supplementary material
Source: MDPI journal article supplement (https://www.mdpi.com/search?q=molecules-23-03232)

## Supplementary Materials

### **Synthesis and Anti-inflammatory Activities of Phloroglucinol-Based Derivatives**

Ning Li<sup>1,2</sup>, Shabana I. Khan<sup>1,3</sup>, Shi Qiu<sup>1,3</sup> and Xing-Cong Li<sup>1,3,\*</sup>

<sup>1</sup> Nation Center for Natural Products Research, Research Institute of Pharmaceutical Sciences,

School of Pharmacy, The University of Mississippi, Mississippi 38677, United States

<sup>2</sup> School of Pharmacy, Anhui Medical University, Hefei 230032, P.R. China; ahmulining@163.com

<sup>3</sup>Department of Biomolecular Sciences, School of Pharmacy, The University of Mississippi,

University, Mississippi 38677, United States

#### **Table of Contents**

|                                                                                                                                                              |     |
|--------------------------------------------------------------------------------------------------------------------------------------------------------------|-----|
| 1. <sup>1</sup> H-NMR and <sup>13</sup> C-NMR spectra of compound <b>2</b> .....                                                                             | S2  |
| 2. <sup>1</sup> H-NMR and <sup>13</sup> C-NMR spectra of compound <b>3</b> .....                                                                             | S3  |
| 3. <sup>1</sup> H-NMR and <sup>13</sup> C-NMR spectra of compounds <b>4</b> .....                                                                            | S4  |
| 4. <sup>1</sup> H-NMR and <sup>13</sup> C-NMR spectra of compound <b>5</b> .....                                                                             | S5  |
| 5. <sup>1</sup> H-NMR and <sup>13</sup> C-NMR spectra of compound <b>6</b> .....                                                                             | S6  |
| 6. <sup>1</sup> H-NMR and <sup>13</sup> C-NMR spectra of compound <b>7</b> in C <sub>5</sub> D <sub>5</sub> N .....                                          | S7  |
| 7. H-H COSY and HSQC spectra of compound <b>7</b> in C <sub>5</sub> D <sub>5</sub> N .....                                                                   | S8  |
| 8. HMBC in C <sub>5</sub> D <sub>5</sub> N and TOF MS ES <sup>+</sup> spectrum of compound <b>7</b> .....                                                    | S9  |
| 9. <sup>1</sup> H-NMR and <sup>13</sup> C-NMR spectra of compound <b>7</b> in CD <sub>3</sub> OD.....                                                        | S10 |
| 10. <sup>1</sup> H-NMR spectrum of compound <b>7</b> in CDCl <sub>3</sub> and <sup>1</sup> H-NMR spectra in different<br>solvents of compound <b>7</b> ..... | S11 |
| 11. MS ESI (-) spectra of compounds <b>4-6</b> .....                                                                                                         | S12 |

S2.  $^1\text{H}$ -NMR spectrum of compound **2** (400 MHz,  $\text{CD}_3\text{COCD}_3$ )

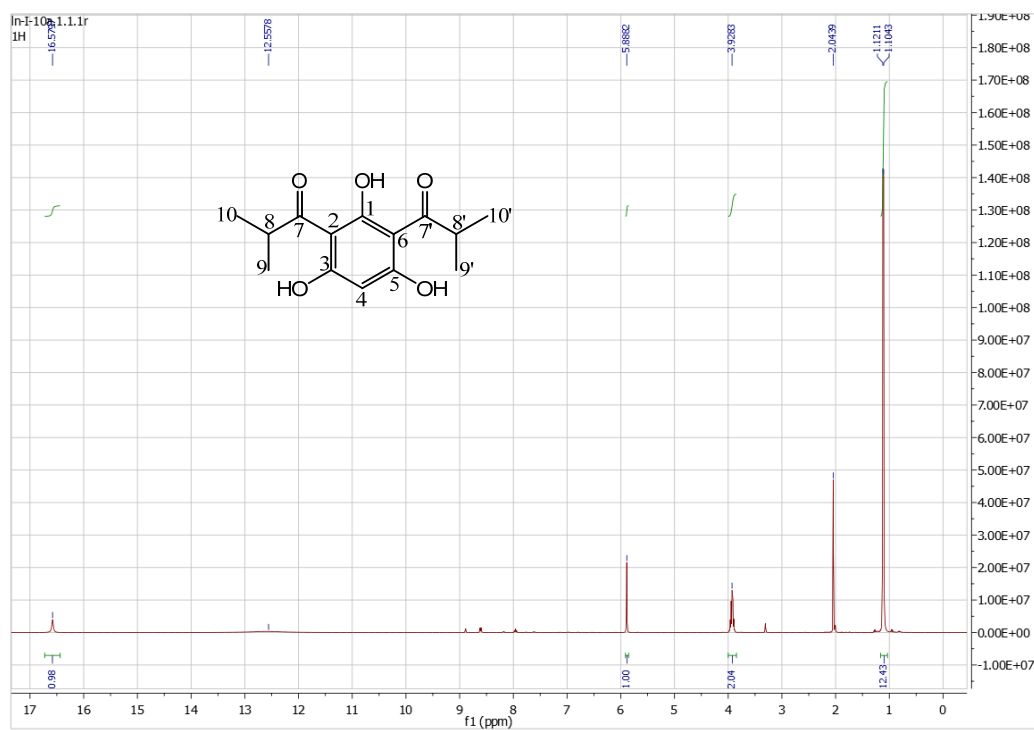

S2.  $^{13}\text{C}$ -NMR spectra of compound **2** (100 MHz,  $\text{CD}_3\text{COCD}_3$ )

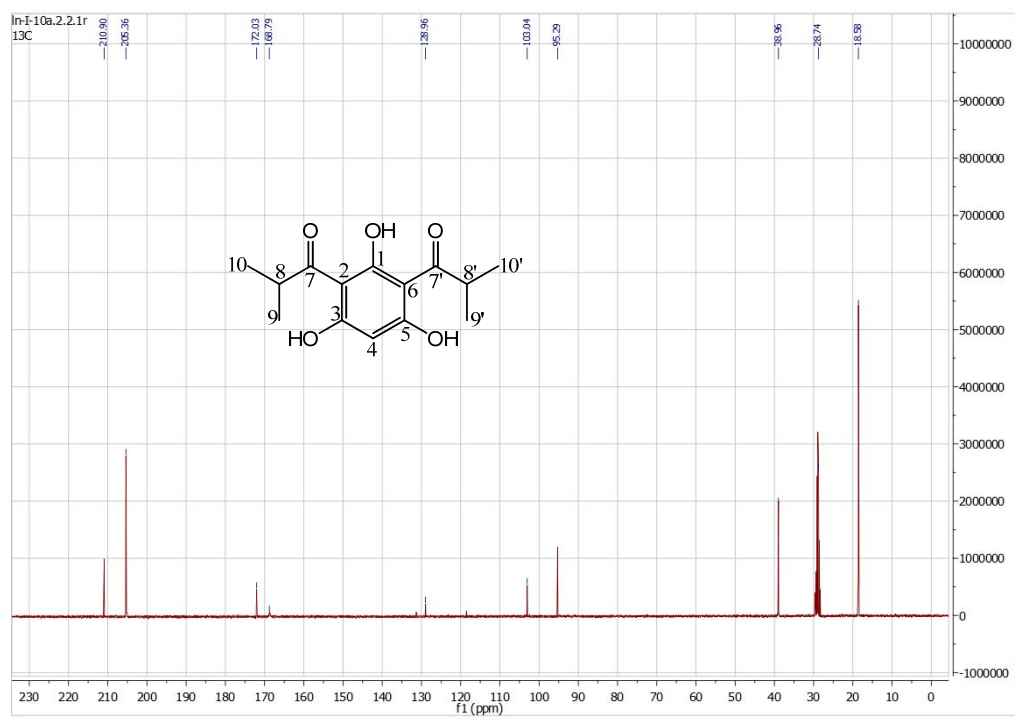

S3.  $^1\text{H}$ -NMR spectrum of compound **3** (400 MHz,  $\text{CD}_3\text{COCD}_3$ )

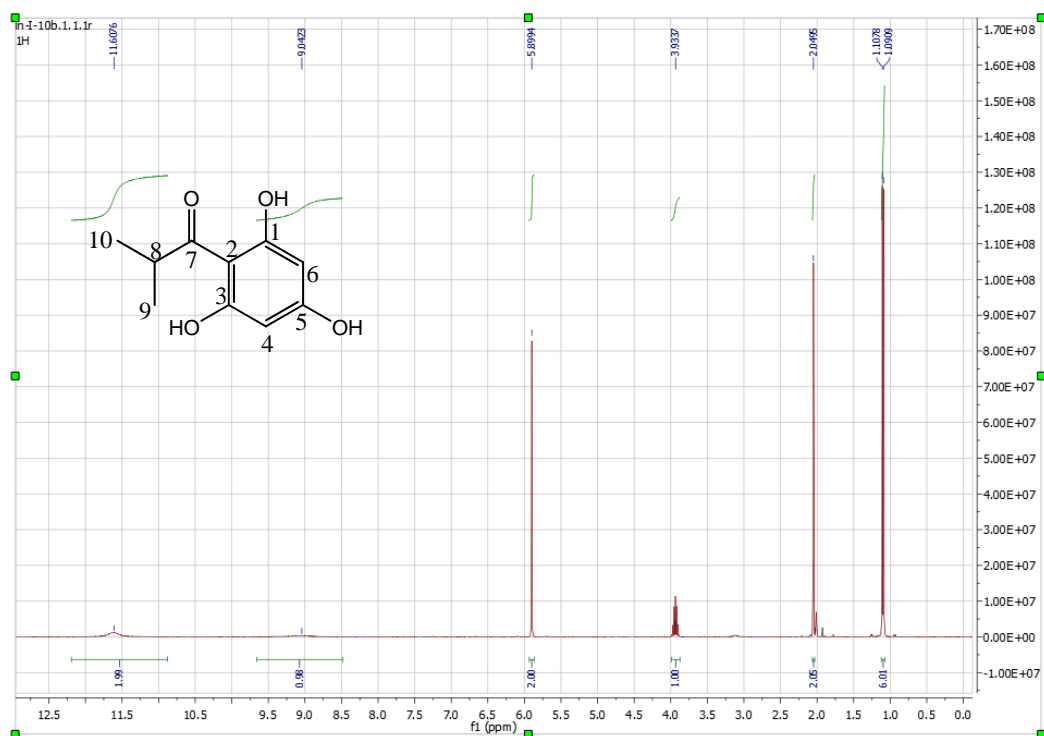

S3.  $^{13}\text{C}$ -NMR spectra of compound **3** (100 MHz,  $\text{CD}_3\text{COCD}_3$ )

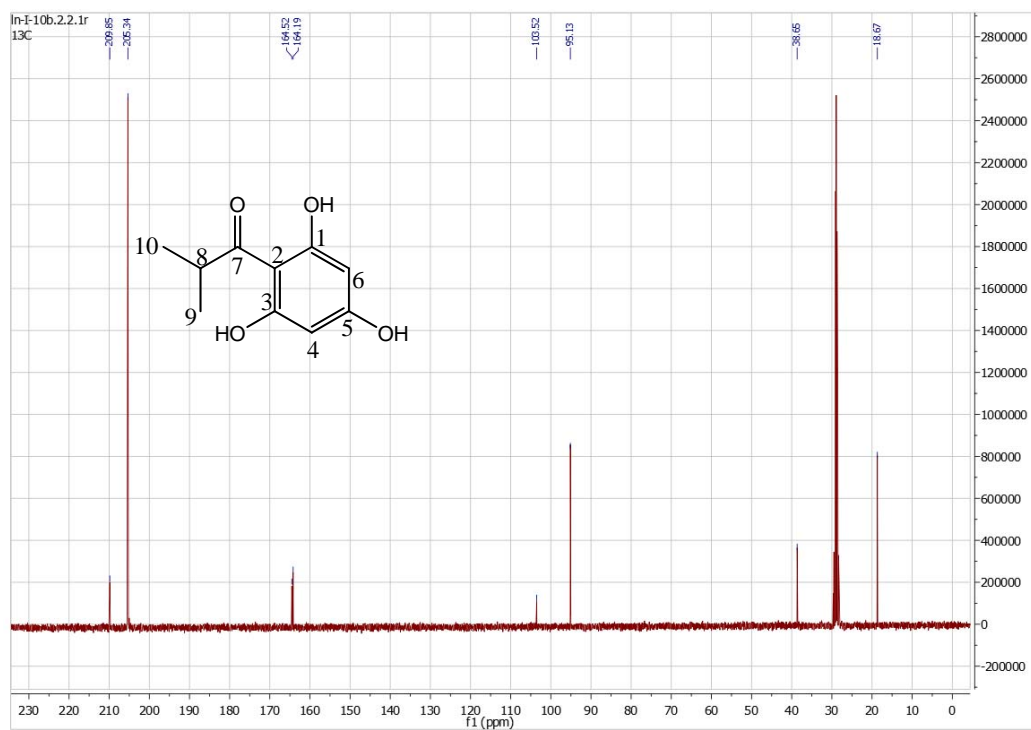

S4.  $^1\text{H-NMR}$  spectrum of compound **4** (400 MHz,  $\text{CD}_3\text{COCD}_3$ )

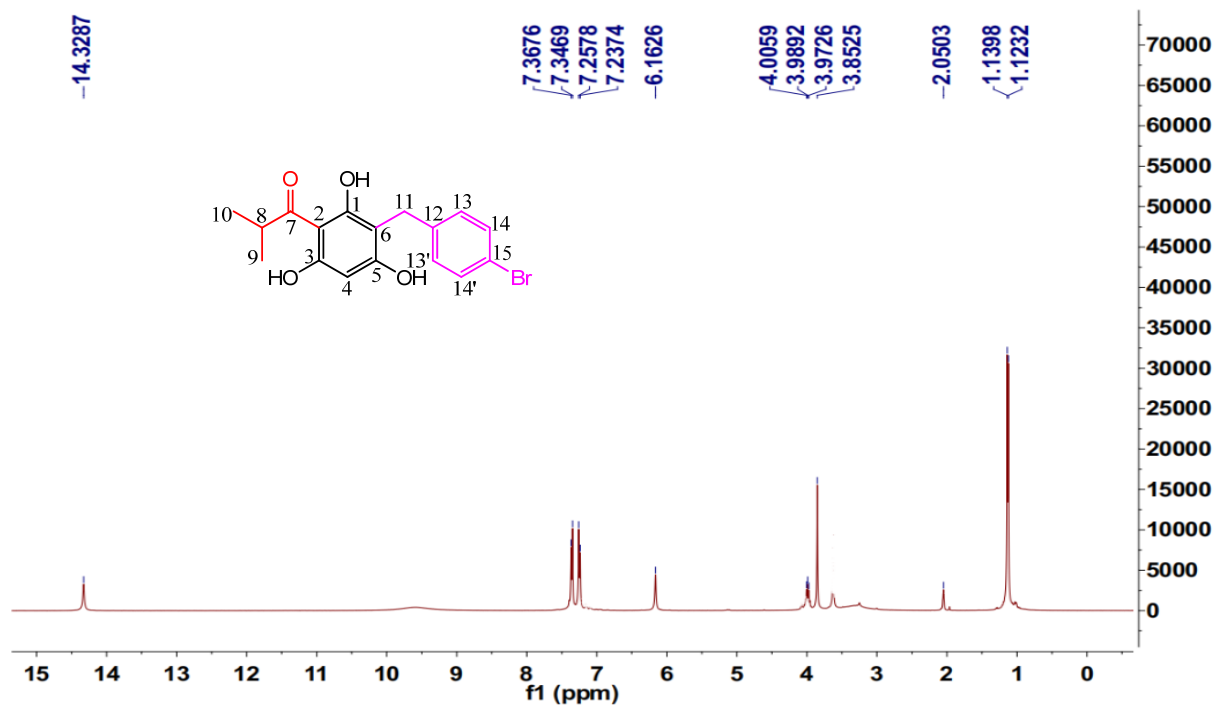

S4.  $^{13}\text{C-NMR}$  spectrum of compound **4** (100 MHz,  $\text{CD}_3\text{COCD}_3$ )

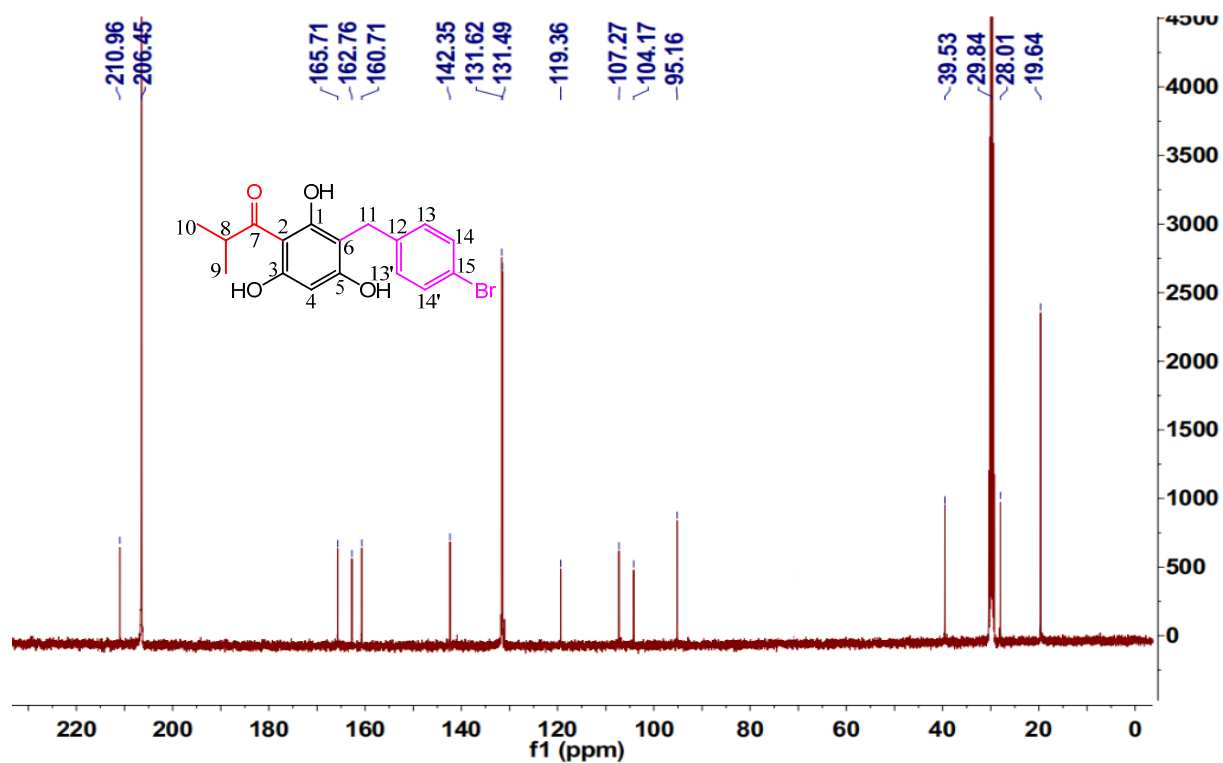

S5.  $^1\text{H-NMR}$  spectrum of compound **5** (400 MHz,  $\text{CDCl}_3$ )

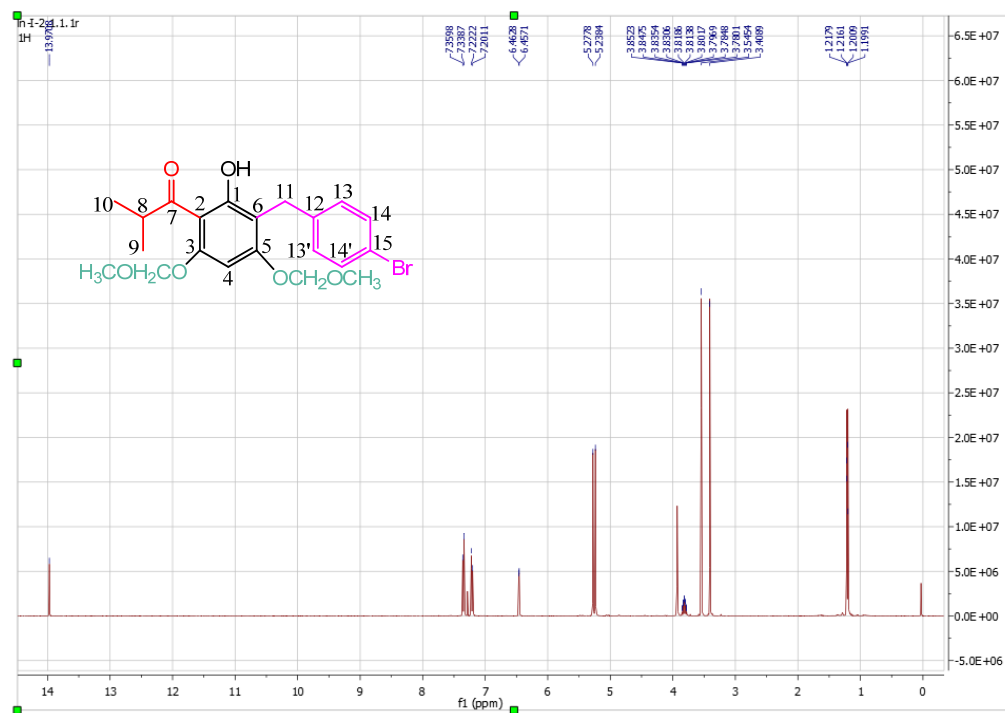

S5.  $^{13}\text{C-NMR}$  spectrum of compound **5** (100 MHz,  $\text{CDCl}_3$ )

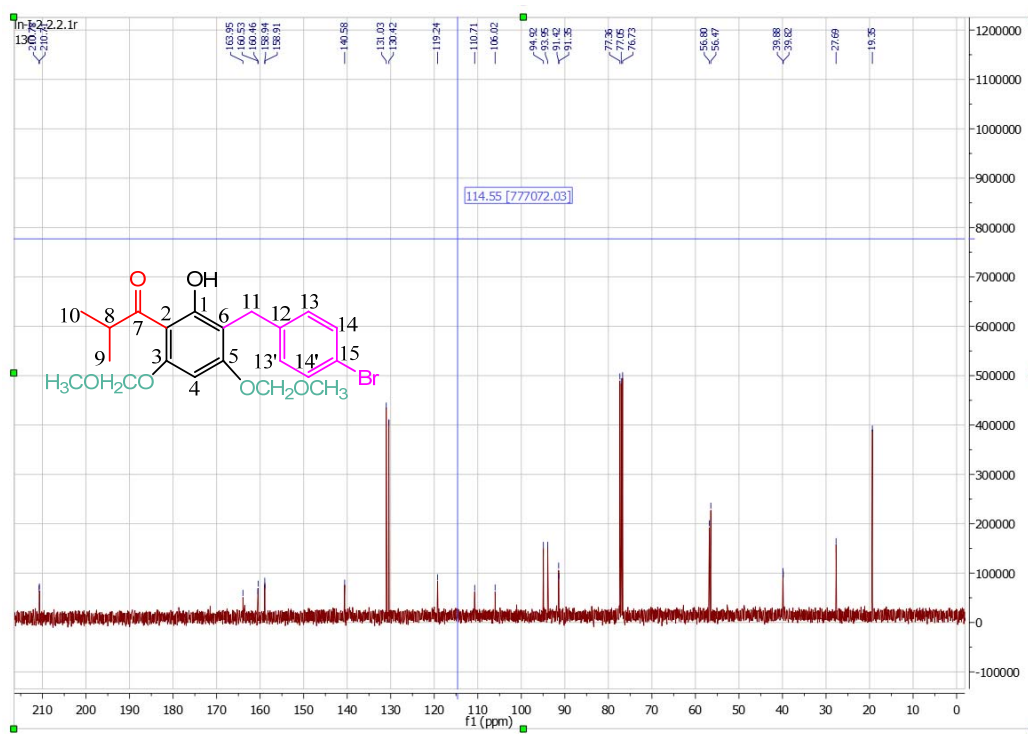

S6.  $^1\text{H-NMR}$  spectrum of compound **6** (400 MHz,  $\text{CD}_3\text{COCD}_3$ )

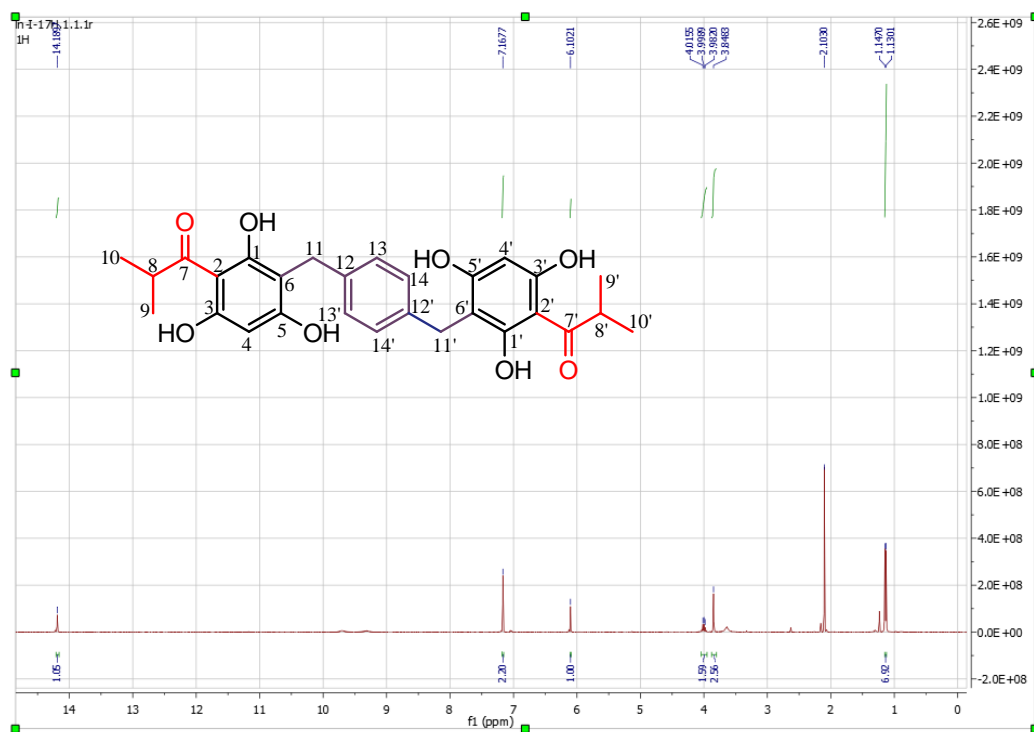

S6.  $^{13}\text{C-NMR}$  spectrum of compound **6** (100 MHz,  $\text{CD}_3\text{COCD}_3$ )

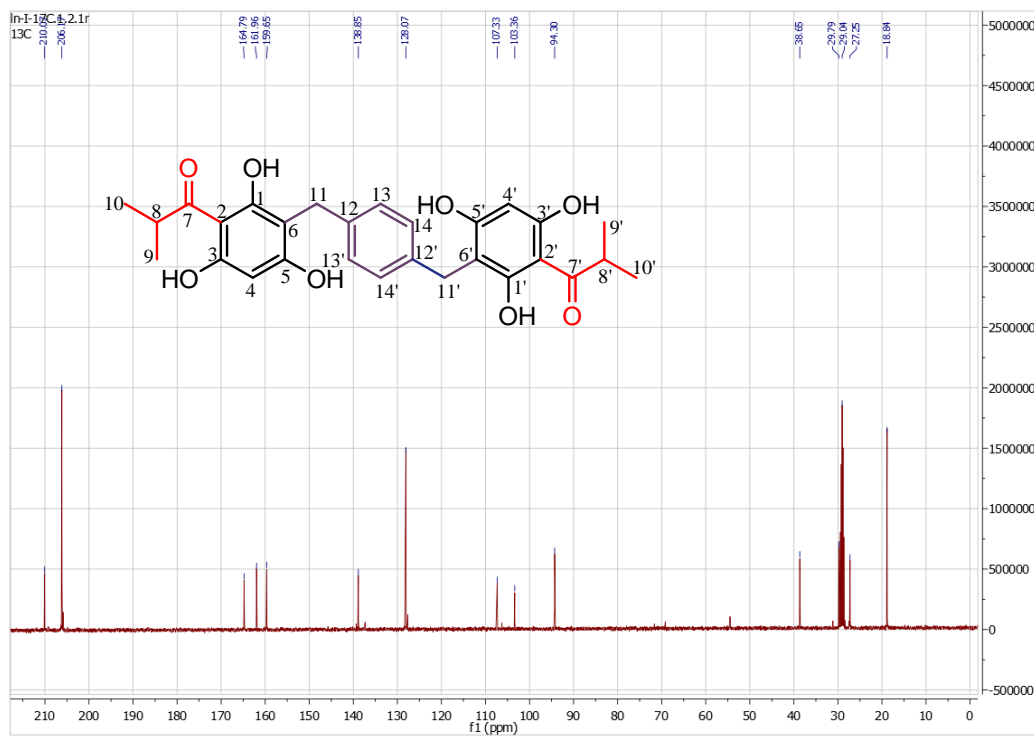

S7.  $^1\text{H-NMR}$  spectrum of compound **7** (400 MHz,  $\text{C}_5\text{D}_5\text{N}$ )

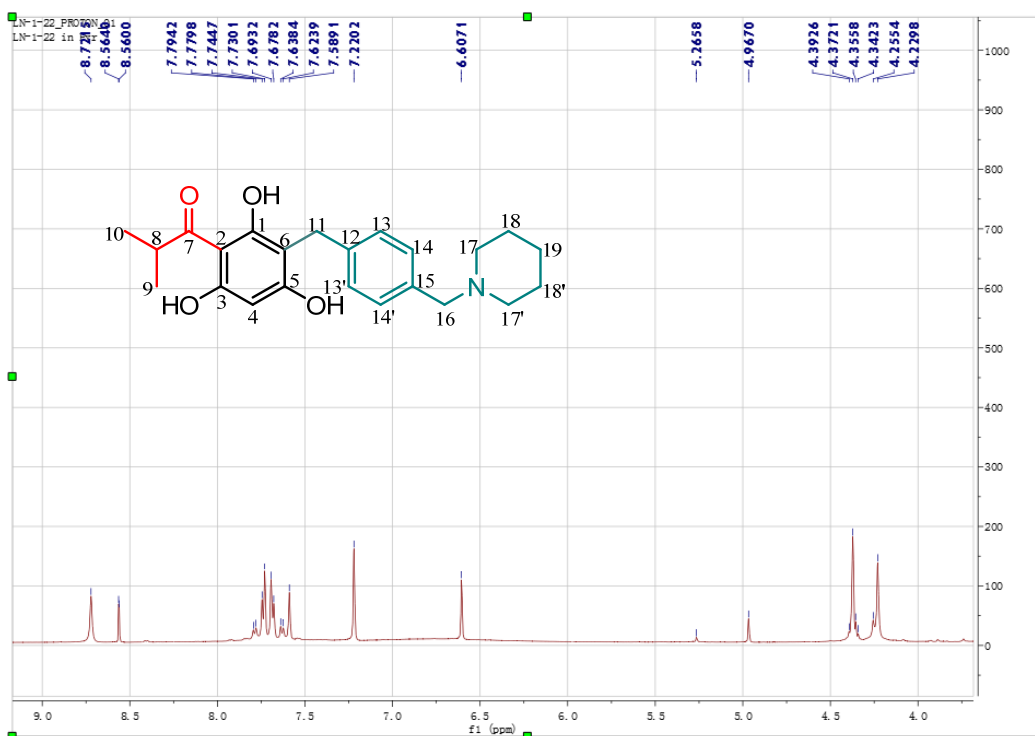

S7.  $^{13}\text{C-NMR}$  spectrum of compound **7** (100 MHz,  $\text{C}_5\text{D}_5\text{N}$ )

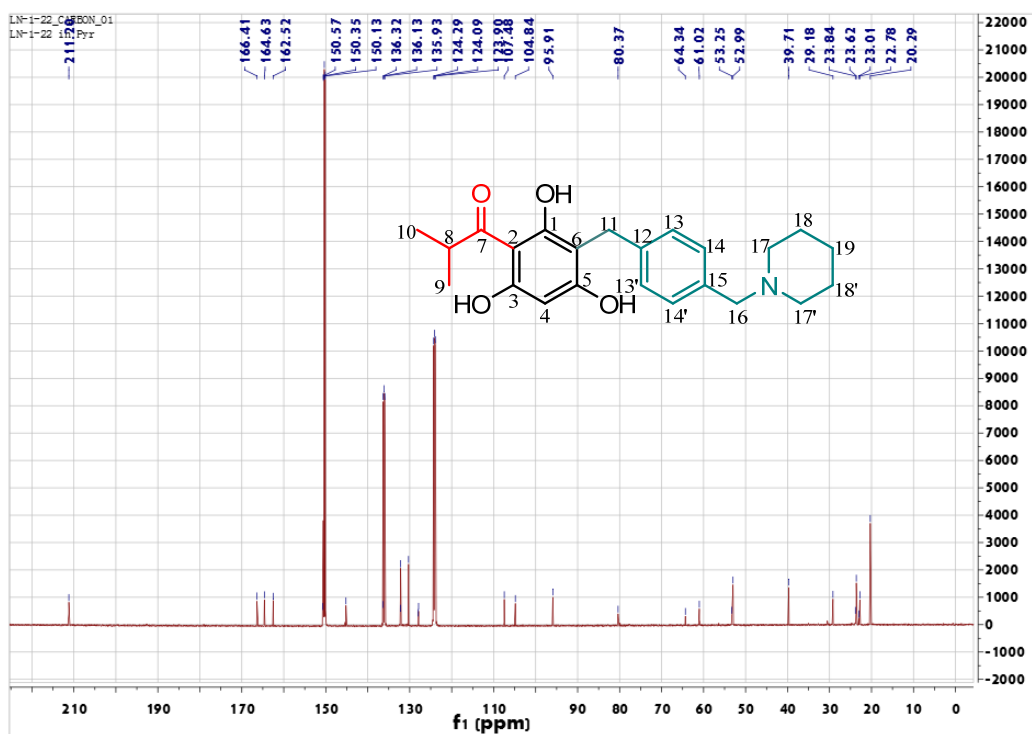

S8. H-H COSY spectrum of compound **7** in C<sub>5</sub>D<sub>5</sub>N

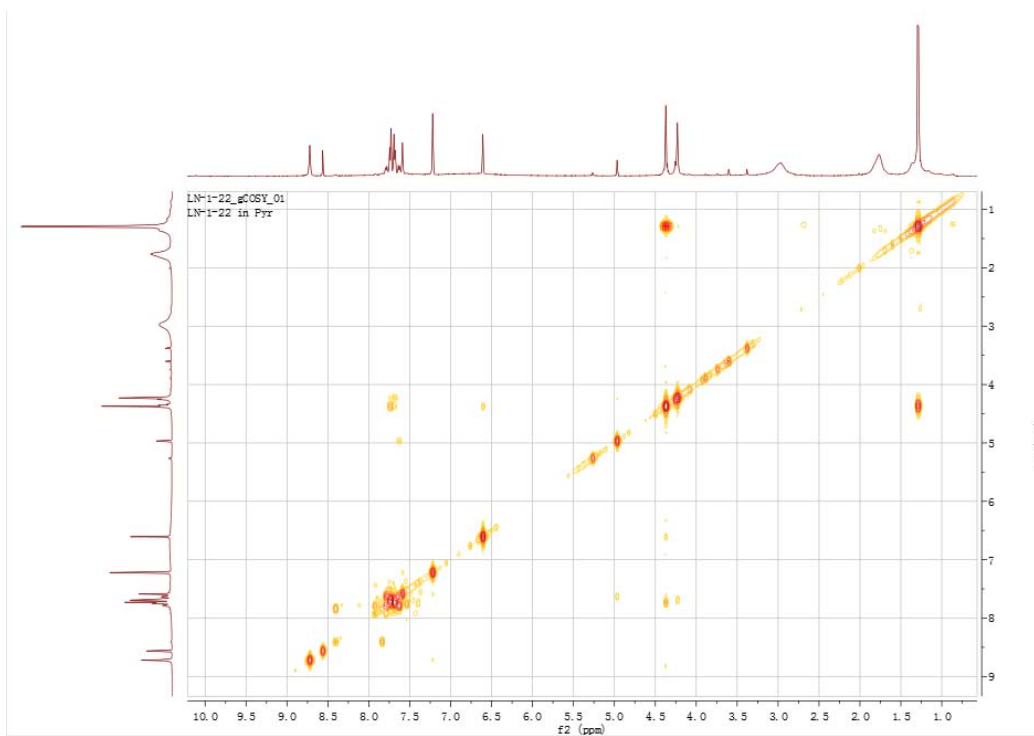

S8. HSQC spectrum of compound **7** in C<sub>5</sub>D<sub>5</sub>N

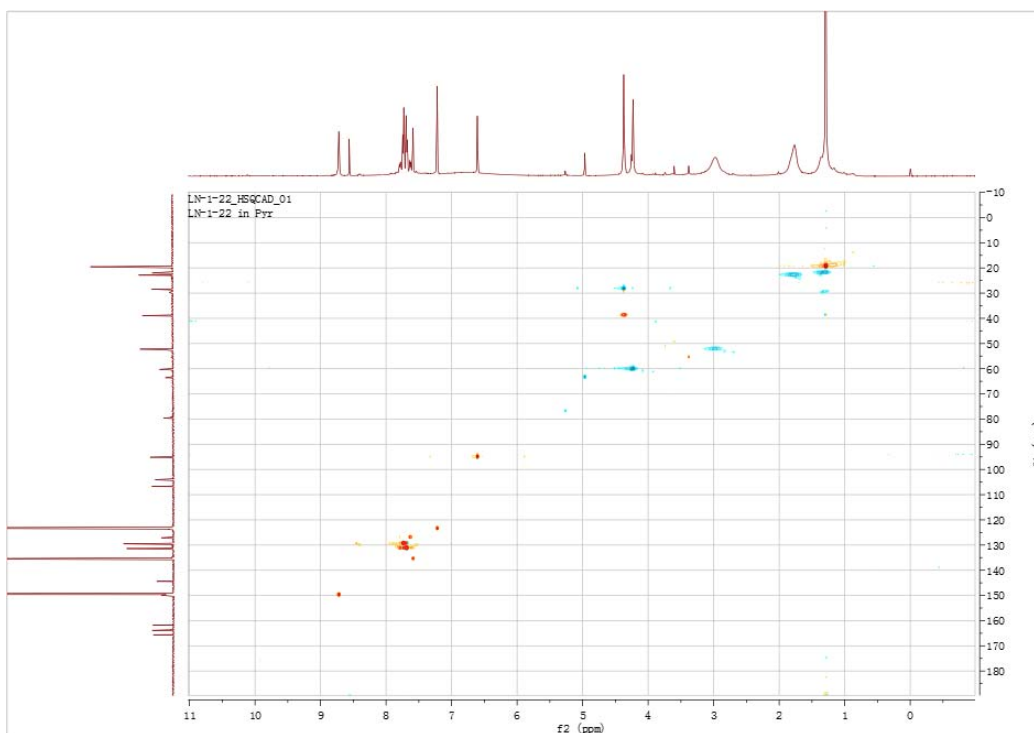



S9. HMBC spectrum of compound 7 in C<sub>5</sub>D<sub>5</sub>N

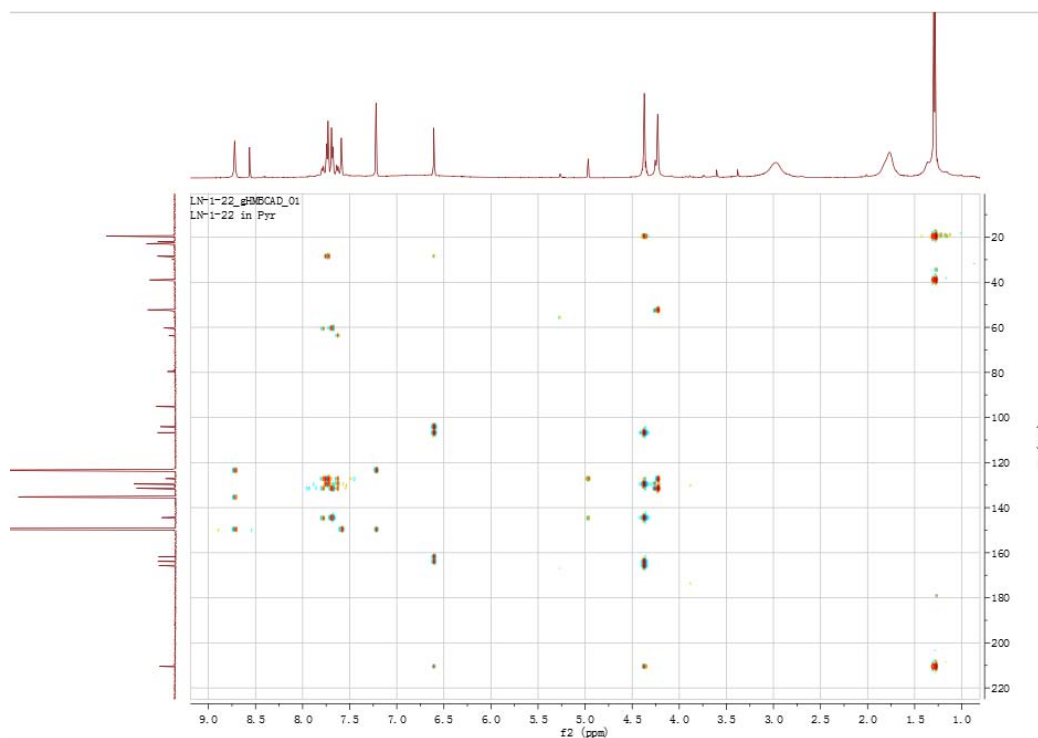

S9. TOF MS ES<sup>+</sup> spectrum of compound 7

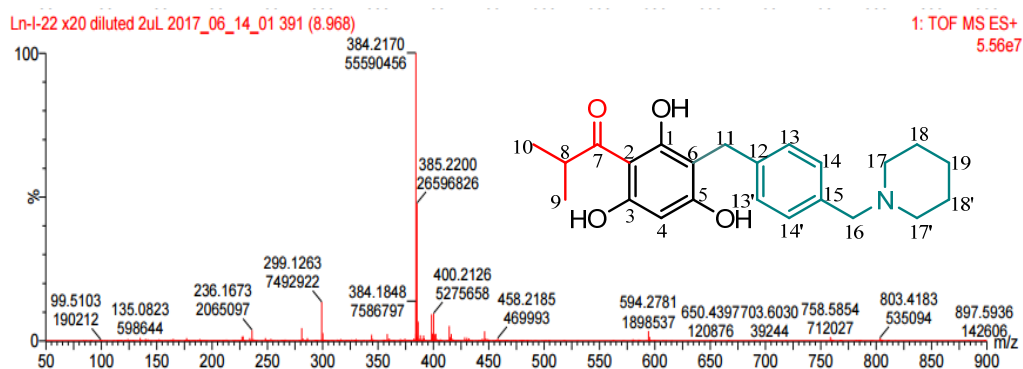

S10.  $^1\text{H-NMR}$  spectrum of compound **7** (400 MHz,  $\text{CD}_3\text{OD}$ )

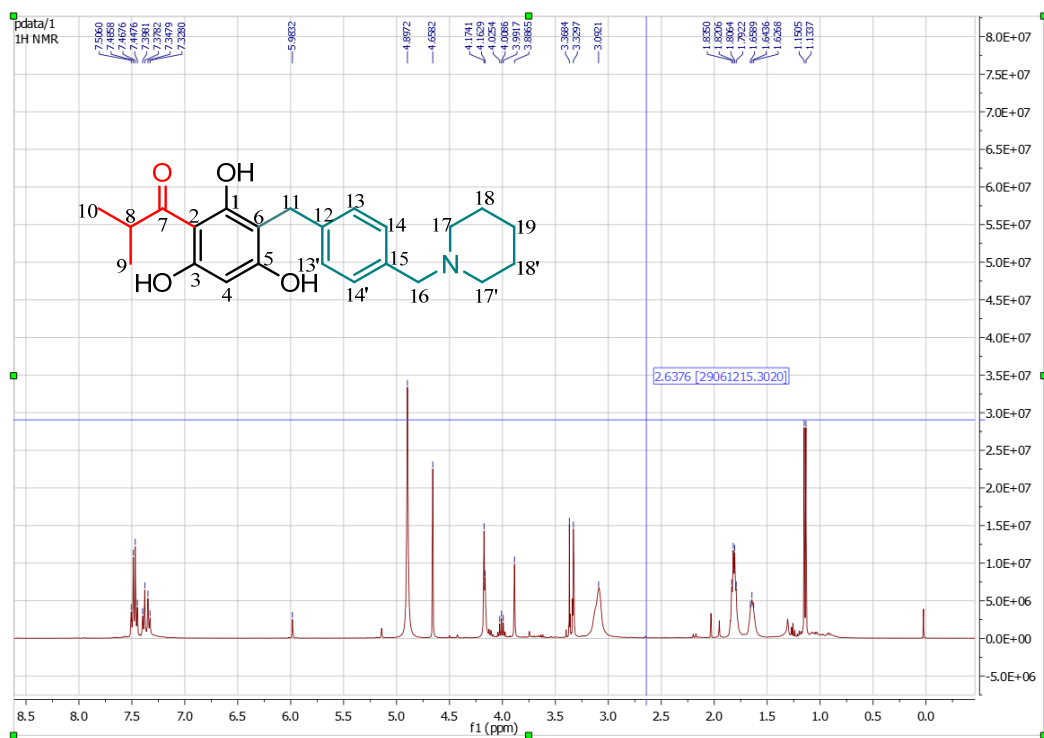

S10.  $^{13}\text{C-NMR}$  spectrum of compound **7** (100 MHz,  $\text{CD}_3\text{OD}$ )

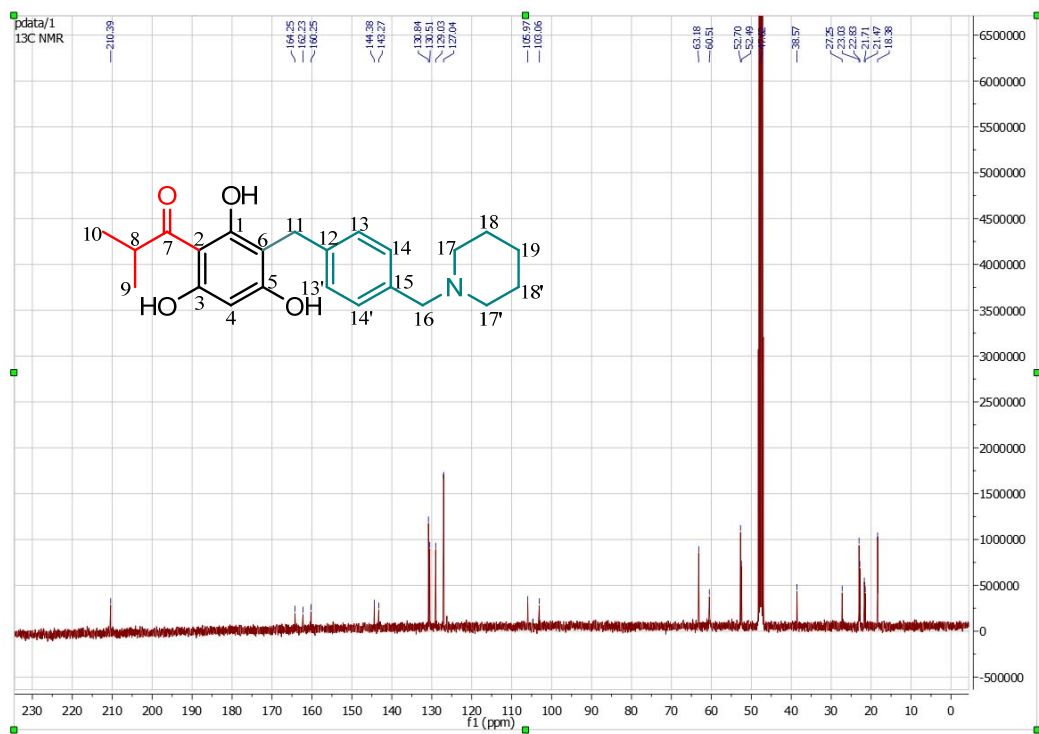

S11.  $^1\text{H-NMR}$  spectrum of compound **7** (400 MHz,  $\text{CDCl}_3$ )

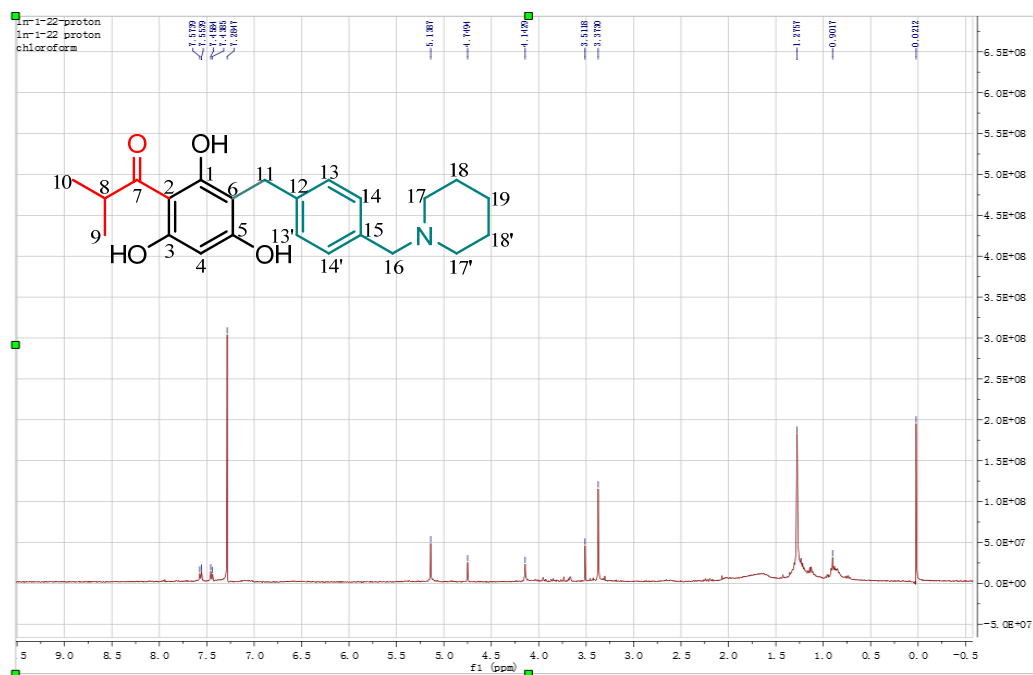

S11.  $^1\text{H-NMR}$  spectra of compound **7** in different solvents

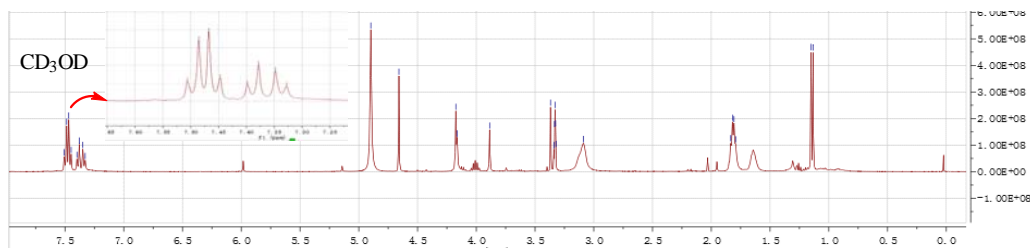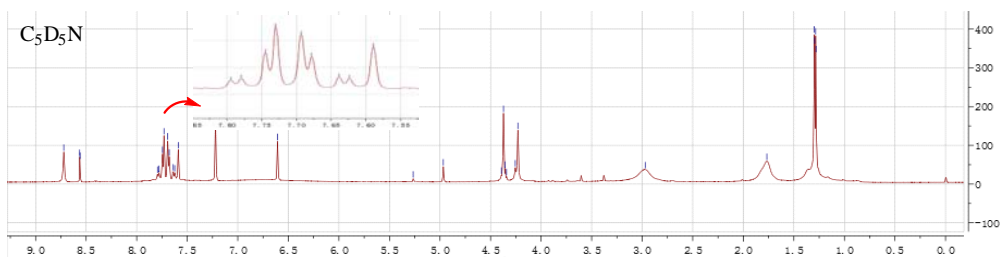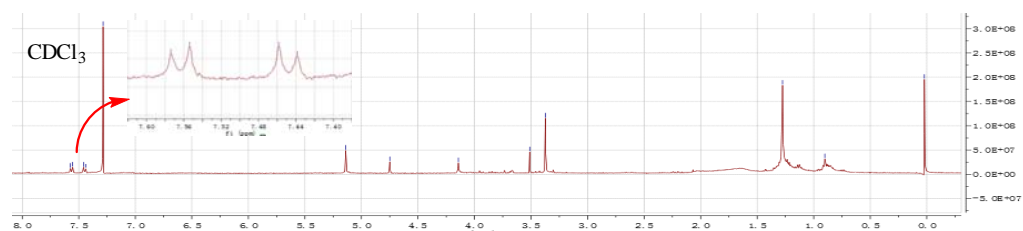

S12. MS ESI (-) spectra of compounds 4-6

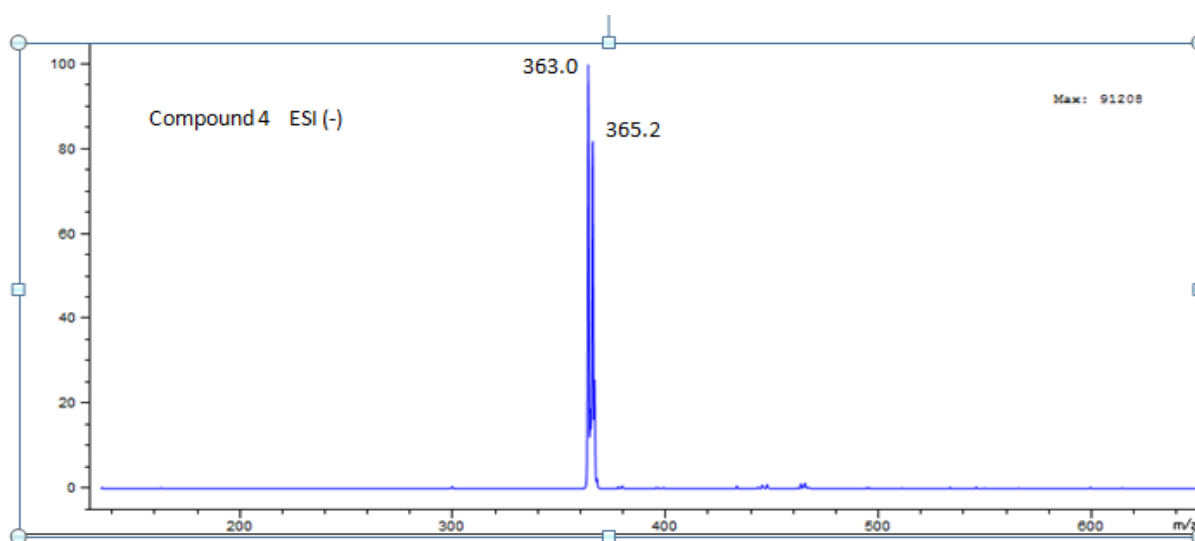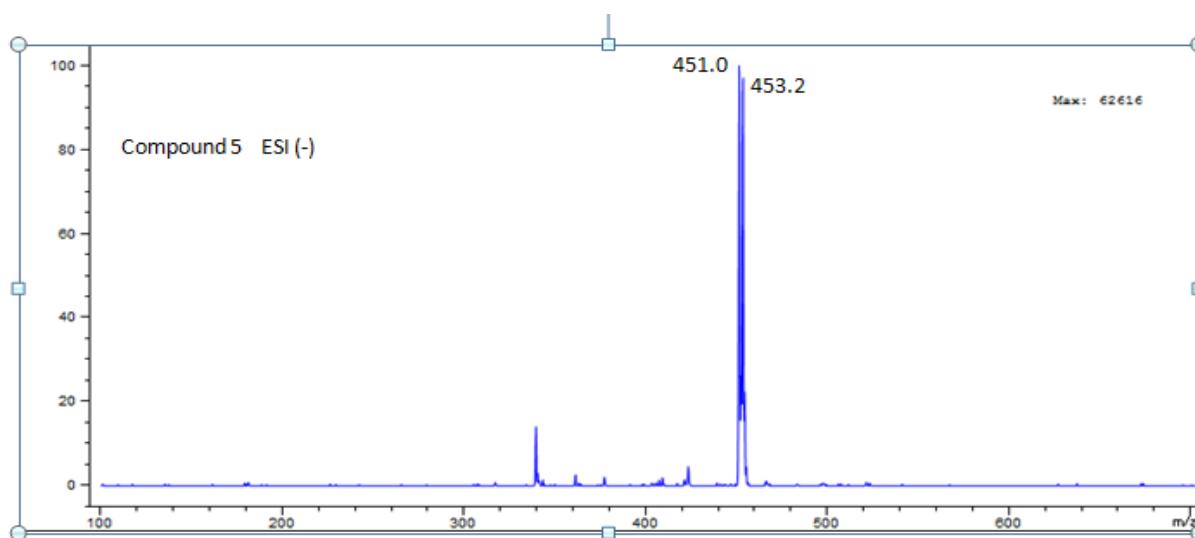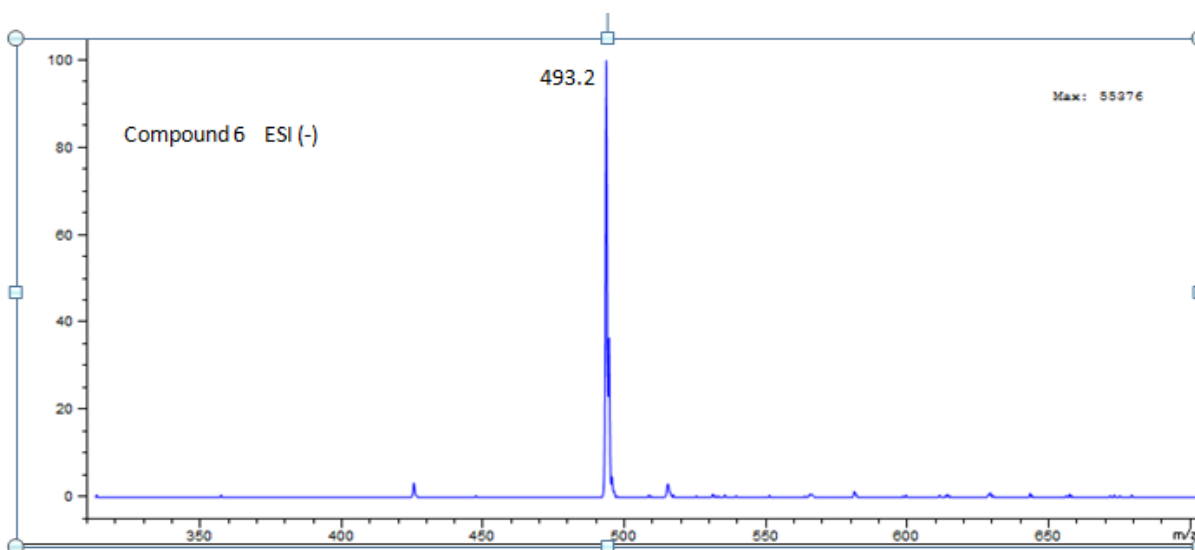

Supplement: s001 [file molecules-23-03232-s001.pdf]
